# Supplementary material
Source: publisher figshare collection journal article supplement (https://sage.figshare.com/ndownloader/files/14523275)
Supplement: Supplementary file 1 [file 14523275]

Table S2

*Descriptive Statistics for Baseline Negative Affect and Raw Pre-Existing Differences between Warning Conditions*

| Experiment | Warning and more negative material |                | No warning and more negative material |                | Warning and less negative material |                | No warning and less negative material |                | Effect of warning condition before more negative |               | Effect of warning condition before less negative |               |
|------------|------------------------------------|----------------|---------------------------------------|----------------|------------------------------------|----------------|---------------------------------------|----------------|--------------------------------------------------|---------------|--------------------------------------------------|---------------|
|            | <i>M</i>                           | 95% CI         | <i>M</i>                              | 95% CI         | <i>M</i>                           | 95% CI         | <i>M</i>                              | 95% CI         | <i>M</i> diff                                    | 95% CI diff   | <i>M</i> diff                                    | 95% CI diff   |
| 1a         | 16.72                              | [15.49, 17.95] | 15.65                                 | [14.63, 16.67] |                                    |                |                                       |                | 1.07                                             | [-0.52, 2.66] |                                                  |               |
| 1b         | 13.17                              | [11.72, 14.62] | 12.10                                 | [10.99, 13.22] |                                    |                |                                       |                | 1.06                                             | [-0.79, 2.92] |                                                  |               |
| 2a         | 13.36                              | [11.81, 14.91] | 14.78                                 | [12.49, 17.07] | 15.39                              | [12.65, 18.14] | 15.89                                 | [13.14, 18.65] | -1.42                                            | [-4.16, 1.33] | -0.50                                            | [-4.30, 3.30] |
| 2b         | 12.41                              | [11.16, 13.67] | 13.57                                 | [12.12, 15.02] | 12.13                              | [11.04, 13.21] | 12.75                                 | [11.62, 13.89] | -1.16                                            | [-3.06, 0.75] | -0.63                                            | [-2.20, 0.94] |
| 3          | 13.76                              | [12.48, 15.03] | 13.26                                 | [12.10, 14.42] | 12.77                              | [11.85, 13.69] | 13.88                                 | [12.49, 15.27] | 0.50                                             | [-1.25, 2.25] | -1.11                                            | [-2.78, 0.55] |
| 4          | 14.53                              | [13.12, 15.93] | 15.06                                 | [13.50, 16.63] | 13.56                              | [11.98, 15.15] | 13.12                                 | [11.95, 14.28] | -0.54                                            | [-2.62, 1.54] | 0.45                                             | [-1.48, 2.37] |

*Note.* Affect measured using the Positive And Negative Affect Schedule (Watson & Clark, 1999; Watson, Clark, & Tellegen, 1988), administered prior to any manipulations. Differences calculated by subtracting the mean baseline negative affect of subjects who would not go on to see a warning from the mean baseline negative affect of those who would, separately (where applicable) for those who would go on to see a more negative film and those who would go on to see a less negative film.
